# Supplementary material for: Convex Relaxations for Gas Expansion Planning
Source: Atypon-hosted journal article supplement (doi:10.1287/ijoc.2016.0697), 2016-08-25
Supplement: ijoc.2016.0697-sm.pdf [file ijoc.2016.0697-sm.pdf]

# Online Supplement to *Convex Relaxations for Gas Expansion Planning*

Conrado Borraz-Sánchez, Russell Bent, Scott Backhaus,  
Hassan Hijazi, and Pascal Van Hentenryck

This document contains supplementary material related to the data sets used to conduct the computational experiments described in the paper.

## 1 The Benchmarks

### 1.1 The Belgian Network

Table 1 shows the list of test instances based on the Belgian network depicted in Figure 1. The table shows, for each benchmark, the number of nodes, sources, terminals, base pipelines, and compressor stations, as well as the number of new components (pipelines and compressors) that can potentially be added to the network topology. Note that benchmark  $A$  in Table 1 is the real Belgium gas transmission network, and Table 2 shows the node characteristics for this 20-node, 24-pipeline, 3-compressor network. The reader is referred to the appendix of (De Wolf and Smeers 2000) for further details on this network.

Instances  $A_1 - A_3$  capture various possible expansions to the Belgian base network. Figure 2 and Tables 3 and 4 depict the location of the potential expansion plans and their associated data. The network expansion plans were designed for the Belgian gas network in order to capture events such as increase of the number of nominations and forecasting demand at the city gates, as well as excessive stress of the available supplies at the sources.

Instances  $B_1 - B_4$  are based on the “optimization from scratch” benchmarks from (De Wolf and Smeers 2000) and (Babonneau et al. 2012), where an increasing weighting factor  $\alpha = \{1, 1.6, 5, \text{ and } 6\}$ , respectively, was used on the investment cost function. In these papers, the authors use the Belgian gas network for a variation of the GTNEP problem that minimizes a combination of operating and expansion costs (the combinations are weighted by  $\alpha$ ). These benchmarks specify minimum and maximum production levels (see Table 5). Since the GTNEP assumes known gas nomination and production profiles, we computed load and

| Ref   | Network configuration |               |               |                 |                 |                 |                 |
|-------|-----------------------|---------------|---------------|-----------------|-----------------|-----------------|-----------------|
|       | $\mathcal{N}$         | $\mathcal{I}$ | $\mathcal{D}$ | Base            |                 | New             |                 |
|       |                       |               |               | $\mathcal{P}_e$ | $\mathcal{C}_e$ | $\mathcal{P}_n$ | $\mathcal{C}_n$ |
| $A$   | 20                    | 6             | 9             | 24              | 3               | 0               | 0               |
| $A_1$ | 22                    | 6             | 9             | 24              | 3               | 4               | 2               |
| $A_2$ | 25                    | 6             | 9             | 24              | 3               | 7               | 4               |
| $A_3$ | 29                    | 6             | 9             | 24              | 3               | 12              | 5               |
| $B_1$ | 20                    | 6             | 9             | 0               | 0               | 135             | 12              |
| $B_2$ | 20                    | 6             | 9             | 0               | 0               | 135             | 12              |
| $B_3$ | 20                    | 6             | 9             | 0               | 0               | 135             | 12              |
| $B_4$ | 20                    | 6             | 9             | 0               | 0               | 135             | 12              |

Table 1: Test Instances Based on the Belgian Network.

compression profiles based on optimal pressures provided in (Babonneau et al. 2012). Our instances also employ the same cost function as in (Babonneau et al. 2012) to compute the associated costs for building new pipelines, i.e.,

$$L_{ij} (1.04081^{-6} D_{ij}^{2.5} + 11.2155)$$

where  $D_{ij}$  and  $L_{ij}$  are the diameter and length of pipeline  $(i, j)$ , respectively.

Babonneau et al. (2012) assumed continuous diameter choices. However, we used discrete diameter values corresponding to the solution provided in (De Wolf and Smeers 2000) and in Table 4 of (Babonneau et al. 2012). For completeness, the diameter choices are described in Table 6. Note that the exclusive-set constraint is slightly different for these cases due to the existence of pre-defined parallel pipes. Within in each row of Table 6, the solution must contain one and only diameter choice, and each set of parallel pipes must choose diameters from the same column of Table 6.

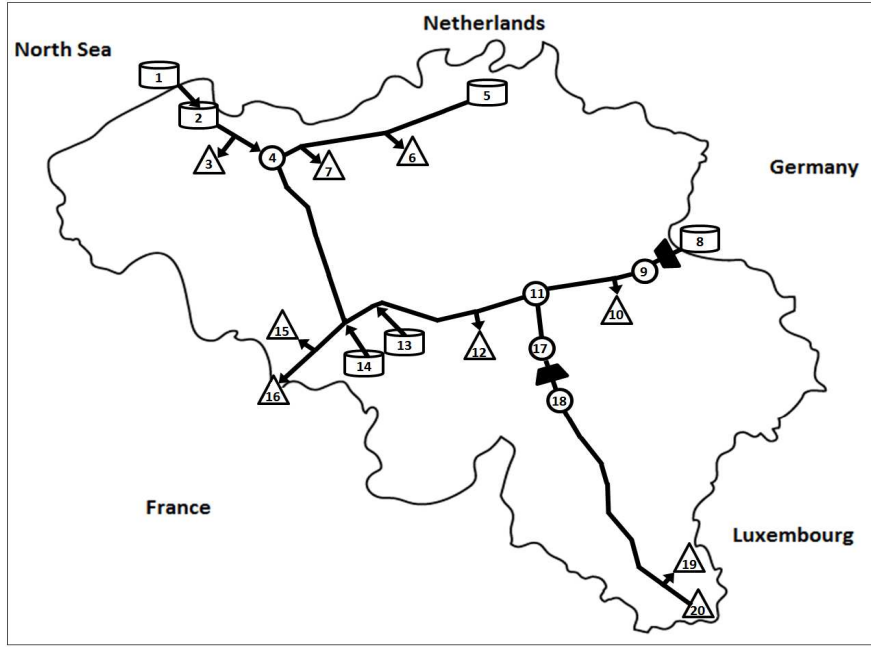

Figure 1: The Belgian Gas Network Base Configuration (case  $A$ ).

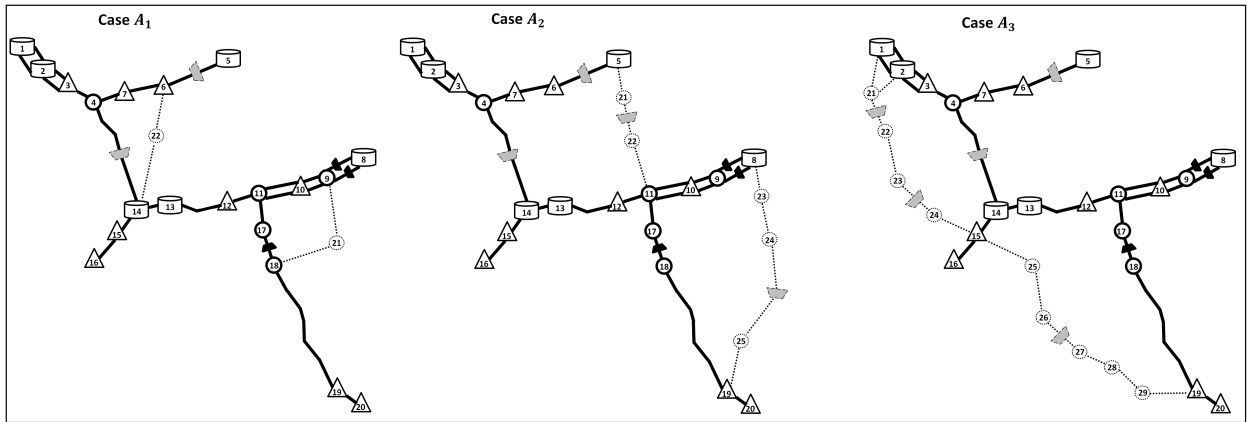

Figure 2: The Belgian Gas Network Expansion Plans (Instances  $A_1$ – $A_3$ ).

| Node (Loc.)     | Type <sup>(*)</sup> | (Loads)         |                |           | (Pressure)      |                   |
|-----------------|---------------------|-----------------|----------------|-----------|-----------------|-------------------|
|                 |                     | $\underline{L}$ | $\overline{L}$ | L         | $\underline{P}$ | $\overline{P}$    |
| 1 (Zeebrugge)   | $\mathcal{I}$       | 8.87            | 11.594         | 10.911288 | 0               | 77                |
| 2 (Dudzele)     | $\mathcal{I}$       | 0               | 8.4            | 8.4       | 0               | 77                |
| 3 (Brugge)      | $\mathcal{D}$       | $-\infty$       | -3.918         | -3.918    | 30              | 80                |
| 4 (Zomergem)    |                     | 0               | 0              | 0         | 0               | 80                |
| 5 (Loenhout)    | $\mathcal{I}$       | 0               | 4.8            | 2.814712  | 0               | 77                |
| 6 (Antwerp)     | $\mathcal{D}$       | $-\infty$       | -4.034         | -4.034    | 30              | 80                |
| 7 (Ghent)       | $\mathcal{D}$       | $-\infty$       | -5.256         | -5.256    | 30              | 80                |
| 8 (Voeren)      | $\mathcal{I}$       | 20.34           | 22.01          | 22.012    | 50              | 66.2              |
| 9 (Berneau)     |                     | 0               | 0              | 0         | 0               | 66.2 <sup>†</sup> |
| 10 (Liège)      | $\mathcal{D}$       | $-\infty$       | -6.365         | -6.365    | 30              | 66.2              |
| 11 (Warnand)    |                     | 0               | 0              | 0         | 0               | 66.2              |
| 12 (Namur)      | $\mathcal{D}$       | $-\infty$       | -2.12          | -2.12     | 0               | 66.2              |
| 13 (Anderlues)  | $\mathcal{I}$       | 0               | 1.2            | 1.2       | 0               | 66.2              |
| 14 (Péronnes)   | $\mathcal{I}$       | 0               | 0.96           | 0.96      | 0               | 66.2              |
| 15 (Mons)       | $\mathcal{D}$       | $-\infty$       | -6.848         | -6.848    | 0               | 66.2              |
| 16 (Blaregnies) | $\mathcal{D}$       | $-\infty$       | -15.616        | -15.616   | 50              | 66.2              |
| 17 (Wanze)      |                     | 0               | 0              | 0         | 0               | 66.2              |
| 18 (Sinsin)     |                     | 0               | 0              | 0         | 0               | 63                |
| 19 (Arlon)      | $\mathcal{D}$       | $-\infty$       | -0.222         | -0.222    | 0               | 66.2              |
| 20 (Pétange)    | $\mathcal{D}$       | $-\infty$       | -1.919         | -1.919    | 25              | 66.2              |

Table 2: The Belgian Gas Network Data from (De Wolf and Smeers 2000). This data is used for the A Problems. †- On Problems A1, A2, and A3, the pressure bounds are  $[0, 59.851968]$ ,  $[0, 59]$ , and  $[0, 59.85]$  respectively.

| Node                          | Town          | Lat.      | Long.    | $\underline{P}^{(*)}$ | $\overline{P}^{(*)}$ |
|-------------------------------|---------------|-----------|----------|-----------------------|----------------------|
| <i>Instance A<sub>1</sub></i> |               |           |          |                       |                      |
| 21                            | Bois          | 50.400676 | 5.855991 | 14                    | 66                   |
| 22                            | Koninklijke   | 50.806672 | 4.481877 | 14                    | 66                   |
| <i>Instance A<sub>2</sub></i> |               |           |          |                       |                      |
| 21                            | Heist         | 51.095651 | 4.744616 | 20                    | 70                   |
| 22                            | Zoutleeuw     | 50.858734 | 5.115404 | 20                    | 70                   |
| 23                            | Beaufays      | 50.552195 | 5.670182 | 20                    | 70                   |
| 24                            | Gouvy         | 50.231757 | 5.966813 | 20                    | 70                   |
| 25                            | Ettelbruck    | 49.861370 | 6.073930 | 20                    | 70                   |
| <i>Instance A<sub>3</sub></i> |               |           |          |                       |                      |
| 21                            | Jabbeke       | 51.204699 | 3.086440 | 14                    | 66                   |
| 22                            | Torhout       | 51.072867 | 3.118026 | 14                    | 66                   |
| 23                            | Kortrijk      | 50.790711 | 3.230636 | 14                    | 66                   |
| 24                            | Bois-de-Barry | 50.580151 | 3.521773 | 14                    | 66                   |
| 25                            | Lobbes        | 50.353208 | 4.263261 | 20                    | 70                   |
| 26                            | Senzeille     | 50.124840 | 4.433550 | 20                    | 70                   |
| 27                            | Gedinne       | 49.980230 | 4.851030 | 20                    | 70                   |
| 28                            | Chiny         | 49.806832 | 5.274004 | 20                    | 70                   |
| 29                            | Pigneule      | 49.735878 | 5.471758 | 20                    | 70                   |

Table 3: Locations of Nodes of the Expansion Plans for the Belgian Gas Network. These nodes do not have injections.

| Node1                         | Node2 | $w$        | $c$    |
|-------------------------------|-------|------------|--------|
| <i>Instance A<sub>1</sub></i> |       |            |        |
| 9                             | 21    | 0.929      | 67.19  |
| 21                            | 18    | 0.808      | 77.26  |
| 6                             | 22    | 0.785      | 79.50  |
| 22                            | 14    | 0.766      | 81.44  |
| <i>Instance A<sub>2</sub></i> |       |            |        |
| 5                             | 21    | 1.052      | 59.29  |
| 21                            | 21*   | Compressor | 1500.0 |
| 22                            | 11    | 0.967      | 64.52  |
| 8                             | 23    | 1.933      | 32.28  |
| 23                            | 24    | 0.876      | 71.18  |
| 24                            | 24*   | Compressor | 1500.0 |
| 25                            | 19    | 1.339      | 46.59  |
| 21*                           | 22    | 0.980      | 63.65  |
| 24*                           | 25    | 0.866      | 72.08  |
| <i>Instance A<sub>3</sub></i> |       |            |        |
| 1                             | 21    | 2.257      | 27.65  |
| 2                             | 21    | 4.546      | 13.73  |
| 21                            | 21*   | Compressor | 1500.0 |
| 22                            | 23    | 1.121      | 55.66  |
| 23                            | 23*   | Compressor | 1500.0 |
| 24                            | 15    | 1.073      | 58.14  |
| 15                            | 25    | 1.483      | 42.09  |
| 25                            | 26    | 1.289      | 48.40  |
| 26                            | 26*   | Compressor | 1500.0 |
| 27                            | 28    | 1.010      | 61.79  |
| 28                            | 29    | 2.232      | 27.96  |
| 29                            | 19    | 1.423      | 42.09  |
| 21*                           | 22    | 2.448      | 25.50  |
| 23*                           | 24    | 1.165      | 53.56  |
| 26*                           | 27    | 1.071      | 58.28  |

\* Denotes introduced dummy node for 0 length compressor arcs

Table 4: Locations of Pipes of the Expansion Plans for the Belgian Gas Network.

| Node | Load ( $L$ ) profiles (MMscf) |          |          |          |
|------|-------------------------------|----------|----------|----------|
|      | $B_1$                         | $B_2$    | $B_3$    | $B_4$    |
| 1    | 9.5883                        | 9.8225   | 9.8218   | 9.7205   |
| 2    | 8.1833                        | 8.3447   | 8.1340   | 8.3628   |
| 3    | -3.9180                       | -3.9180  | -3.9180  | -3.9180  |
| 4    | 0.0000                        | 0.0000   | 0.0000   | 0.0000   |
| 5    | 4.0315                        | 4.0432   | 4.0383   | 4.0364   |
| 6    | -4.0315                       | -4.0432  | -4.0383  | -4.0364  |
| 7    | -5.2413                       | -5.2644  | -5.2562  | -5.2644  |
| 8    | 22.012                        | 22.0120  | 22.0120  | 22.0120  |
| 9    | 0.0000                        | 0.0000   | 0.0000   | 0.0000   |
| 10   | -6.4744                       | -6.4951  | -6.3970  | -6.3816  |
| 11   | 0.0000                        | 0.0000   | 0.0000   | 0.0000   |
| 12   | -2.1929                       | -2.1191  | -2.1162  | -2.0984  |
| 13   | 1.2162                        | 1.3225   | 1.0802   | 1.1591   |
| 14   | 0.9840                        | 0.6164   | 1.0776   | 1.0235   |
| 15   | -6.4056                       | -6.5885  | -6.8366  | -6.8857  |
| 16   | -15.6119                      | -15.5904 | -15.4616 | -15.5899 |
| 17   | 0.0000                        | 0.0000   | 0.0000   | 0.0000   |
| 18   | 0.0000                        | 0.0000   | 0.0000   | 0.0000   |
| 19   | -0.2059                       | -0.2312  | -0.2269  | -0.2164  |
| 20   | -1.9337                       | -1.9112  | -1.9131  | -1.9236  |

Table 5: The Load Profiles Computed from Optimal Pressures Provided in (Babonneau et al. 2012). All compression ratios were derived as 1.0.

| Pipe      | $D_1$ | $D_2$  | $D_3$  | $D_4$ | $D_5$ |
|-----------|-------|--------|--------|-------|-------|
| (1,2) A   | 890.0 | 650.3  | 610.8  | 524.7 | 512.1 |
| (1,2) B   | 890.0 | 650.3  | 610.8  | 524.7 | 512.1 |
| (2,3) A   | 890.0 | 834.7  | 784.0  | 673.5 | 657.3 |
| (2,3) B   | 890.0 | 834.7  | 784.0  | 673.5 | 657.3 |
| (3,4)     | 890.0 | 998.9  | 938.3  | 806.0 | 786.7 |
| (5,6)     | 590.1 | 604.3  | 567.6  | 487.6 | 475.9 |
| (6,7)     | 590.1 | 0      | X      | X     | X     |
| (7,4)     | 590.1 | 671.7  | 630.9  | 542.0 | 529.0 |
| (4,14)    | 890.0 | 829.9  | 779.5  | 669.7 | 653.6 |
| (8,9) A   | 890.0 | 902.8  | 848.0  | 728.4 | 711.0 |
| (8,9) B   | 395.5 | 902.8  | 848.0  | 728.4 | 711.0 |
| (9,10) A  | 890.0 | 902.8  | 848.0  | 728.4 | 710.9 |
| (9,10) B  | 395.5 | 902.8  | 848.0  | 728.4 | 711.0 |
| (10,11) A | 890.0 | 787.6  | 739.8  | 635.5 | 620.1 |
| (10,11) B | 395.5 | 787.6  | 739.8  | 635.5 | 620.4 |
| (11,12)   | 890.0 | 979.8  | 920.3  | 790.6 | 771.6 |
| (12,13)   | 890.0 | 915.1  | 859.6  | 738.4 | 720.7 |
| (13,14)   | 890.0 | 952.6  | 894.7  | 768.6 | 750.1 |
| (14,15)   | 890.0 | 1201.0 | 1128.0 | 969.0 | 945.8 |
| (15,16)   | 890.0 | 1038.4 | 975.3  | 837.9 | 817.7 |
| (11,17)   | 395.5 | 469.0  | 440.5  | 378.4 | 369.3 |
| (17,18)   | 315.5 | 469.0  | 440.5  | 378.4 | 369.3 |
| (18,19)   | 315.5 | 469.0  | 440.5  | 378.4 | 369.3 |
| (19,20)   | 315.5 | 448.9  | 421.7  | 362.2 | 353.5 |

Table 6: Pipe diameter choices from Table 4 of (Babonneau et al. 2012)

## 1.2 Larger Networks

Table 7 describes the main data points for the larger benchmarks. Instance  $D$  is a real-life network case whose data is restricted for confidentiality reasons and we are not allowed to disclose its map or load profile. Instances  $E$ ,  $F$ , and  $G$  correspond to a collection of technical, real-world gas networks taken from GasLib (2014), a library of gas network instances (Pfetsch et al. 2015, Humpola et al. 2015), with data provided by the gas transport company *Open Grid Europe GmbH* as a part of the BMWi project “Technical Capacities of Gas Networks”. The GasLib library, besides including the network configurations with their underlying coordinates, also specifies load profile scenarios. We considered scenario id=“nomination\_1” for instances  $E$  (GasLib-40) and  $F$  (GasLib-135), and scenario id=“nomination\_cold\_5” for instance  $G$  (GasLib-582).

| Ref. | Network configuration |                 |                 |                   |                   |                   |
|------|-----------------------|-----------------|-----------------|-------------------|-------------------|-------------------|
|      | $ \mathcal{N} $       | $ \mathcal{I} $ | $ \mathcal{D} $ | Base              |                   | New               |
|      |                       |                 |                 | $ \mathcal{P}_e $ | $ \mathcal{C}_e $ | $ \mathcal{P}_n $ |
| $D$  | 60                    | 2               | 24              | 55                | 4                 | 55                |
| $E$  | 40                    | 3               | 29              | 39                | 6                 | 39                |
| $F$  | 135                   | 6               | 99              | 141               | 29                | 141               |
| $G$  | 582                   | 31              | 129             | 609               | 5                 | 278               |

Table 7: Larger Instances of Gas Networks.

## 2 Characteristics of the Models

Tables 8 and 9 show the sizes of the underlying models in terms of the number of binary and continuous variables and the number of linear and quadratic constraints for each instance.

| Bench.                      | MINLP |      |     |     | PLA-MIP |      |       |    | MISOCP |     |      |     |
|-----------------------------|-------|------|-----|-----|---------|------|-------|----|--------|-----|------|-----|
|                             | BV    | CV   | LC  | QC  | BV      | CV   | LC    | QC | BV     | CV  | LC   | QC  |
| <i>A</i>                    | 54    | 49   | 254 | 96  | 1494    | 1837 | 3931  | 0  | 54     | 73  | 398  | 24  |
| <i>A</i> <sub>1</sub>       | 70    | 59   | 320 | 112 | 1750    | 2151 | 4605  | 0  | 66     | 91  | 488  | 28  |
| <i>A</i> <sub>2</sub>       | 85    | 69   | 389 | 124 | 1945    | 2391 | 5120  | 0  | 78     | 107 | 575  | 31  |
| <i>A</i> <sub>3</sub>       | 103   | 80   | 463 | 144 | 2263    | 2776 | 5954  | 0  | 91     | 128 | 679  | 36  |
| <i>B</i> <sub>1,2,3,4</sub> | 354   | 1154 | 464 | 357 | 7314    | 8737 | 19067 | 0  | 238    | 373 | 1850 | 116 |

Table 8: The Sizes of the Mathematical models for Belgian Network Instances. (BV: Binary variables, CV: Continuous variables, LC: Linear constraints, QC: Quadratic constraints).

| Ref.     | MINLP |      |      |      | PLA-MIP |       |       |    | MISOCP |      |       |     |
|----------|-------|------|------|------|---------|-------|-------|----|--------|------|-------|-----|
|          | BV    | CV   | LC   | QC   | BV      | CV    | LC    | QC | BV     | CV   | LC    | QC  |
| <i>D</i> | 283   | 174  | 1093 | 440  | 6883    | 8330  | 18018 | 0  | 228    | 339  | 1753  | 110 |
| <i>E</i> | 207   | 124  | 792  | 312  | 4887    | 5920  | 12796 | 0  | 168    | 241  | 1260  | 78  |
| <i>F</i> | 763   | 446  | 2886 | 1128 | 17683   | 21430 | 46304 | 0  | 622    | 869  | 4578  | 282 |
| <i>G</i> | 2101  | 1469 | 8058 | 2256 | 35941   | 44433 | 92848 | 0  | 1823   | 2311 | 11442 | 564 |

Table 9: Size of the Mathematical Models: BV: Binary variables, CV: Continuous variables, LC: Linear constraints, QC: Quadratic constraints.

## References

- Babonneau, F., Y. Nesterov, J.-P. Vial. 2012. Design and operations of gas transmission networks. *Operations Research* **60** 34–47.
- De Wolf, D., Y. Smeers. 2000. The gas transmission problem solved by an extension of the simplex algorithm. *Management Science* **46** 1454–1465.
- GasLib. 2014. A library of gas network instances. URL <http://gaslib.zib.de>.
- Humpola, Jesco, Imke Joormann, Djamal Oucherif, Marc Pfetsch, Lars Schewe, Martin Schmidt, Robert Schwarz. 2015. GasLib - A Library of Gas Network Instances. Tech. rep. URL [http://www.optimization-online.org/DB\\_HTML/2015/11/5216.html](http://www.optimization-online.org/DB_HTML/2015/11/5216.html).
- Pfetsch, M.E., A. Fügenschuh, B. Geißler, N. Geißler, R. Gollmer, B. Hiller, J. Humpola, T. Koch, T. Lehmann, A. Martin, A. Morsi, J. Rövekamp, L. Schewe, M. Schmidt, R. Schultz, R. Schwarz, J. Schweiger, C. Stangl, M. C. Steinbach, S. Vigerske, B. M. Willert. 2015. Validation of nominations in gas network optimization: Models, methods, and solutions. *Optimization Methods & Software* **30** 15–53.
